# Supplementary material for: Type XVIII collagen is essential for survival during acute liver injury in mice
Source: PubMed Central journal article supplement — Dis Model Mech. 2013 Apr 4;6(4):942–51. doi: 10.1242/dmm.011577 (PMC3701214; doi:10.1242/dmm.011577), 2013-04-04

**SUPPLEMENTAL TABLE I**

| <b>Gene</b>                    | <b>Forward Primer (5→3)</b> | <b>Reverse Primer (5→3)</b> |
|--------------------------------|-----------------------------|-----------------------------|
| <i>Cyp2e1</i>                  | GAAGGACGTGCGGAGGTTTT        | GCCAATCAGAAAGGTAGGGTC       |
| <i>Alb</i>                     | TGCTTTTTCCAGGGGTGTGTT       | TTACTTCCTGCACTAATTTGGCA     |
| <i>Fga</i>                     | AGTCTGGACTACAGATACCGAAG     | CGTCAATCAACCCTTTCATCCTG     |
| <i>Fgb</i>                     | TGGCAACGCCCTCATGGACG        | TCCGTAGTTACCCAGCCGTCGT      |
| <i>Fgg</i>                     | GGCAGAACCAGCACTGCGGA        | AGGCATCCCCGGCATCTCCA        |
| <i>Itga1</i>                   | TGCGCAACGCATTCCCTCAG        | CTGGCCCAGAAGAGGGCAGC        |
| <i>Itga2</i>                   | GAATCCGGGGACCGGAGGCT        | ACGAGGGAAGGGCAAGCCTGA       |
| <i>Itga3</i>                   | GGCCTTGATGGTGGCGGCTT        | GCCCCGGCCAGAAGGAGGTA        |
| <i>Itga5</i>                   | GCCGGGAAGGGACGGAGTCA        | GGAGCCATGGGCCCGAACTG        |
| <i>Itgb1</i>                   | TGTGGAGGCAATGGCGTGTGC       | TGCACAGACGCCAAGGCAGG        |
| <i>Coll8a1</i><br><i>short</i> | GTGGGCTAGCGGCTCACCGA        | CACCTCCTCAGCAACATTCTCTGGC   |
| <i>Coll8a1</i><br><i>long</i>  | GCCGAGCTCTCCAGTGCTCC        | AGCAACATTCTCTGGGAAGTCTGGT   |
| <sup>1</sup> <i>mu36b4</i>     | GGAGCCAGCGAGGCCACACTGCTG    | CTGGCCACGTTGCGGACACCCTCC    |

<sup>1</sup>Housekeeping gene

**Supplemental Figure 1. Extracellular matrix expression in liver.** Expression and localization of (A) type XVIII collagen, (B) type IV collagen, (C) perlecan, and (D) laminin.

**Supplemental Figure 2. Type XVIII collagen in liver regeneration.** Partial hepatectomy was performed in Col18a1<sup>-/-</sup> (n=3) and wild type control mice (n=4). The bar graph displays the relative liver weight 7 days post-surgery.

**Supplemental Figure 3. Hepatocyte ballooning degeneration in Col18a1<sup>-/-</sup> mice.** Hematoxylin and eosin staining of (A) WT and (B) Col18a1<sup>-/-</sup> mouse liver given 0.5gram/L phenobarbital in drinking water for 24 hours.

**Supplemental Figure 4. AML12 integrin expression.** Reverse Transcriptase PCR to measure mRNA expression of the  $\alpha 1$ ,  $\alpha 2$ ,  $\alpha 3$ ,  $\alpha 5$ ,  $\alpha 6$ , and  $\beta 1$  integrin subunits in the AML12 cell line.

**Supplemental Figure 5. Akt signaling in Col18a1<sup>-/-</sup> mice.** (A-D) Nuclear localization of phosphorylated Akt (1/2/3) by immuno-fluorescence was lower in Col18a1<sup>-/-</sup> mice when compared to wild type mice and was confirmed by Western blot shown in (E).

Supplemental Figure 1

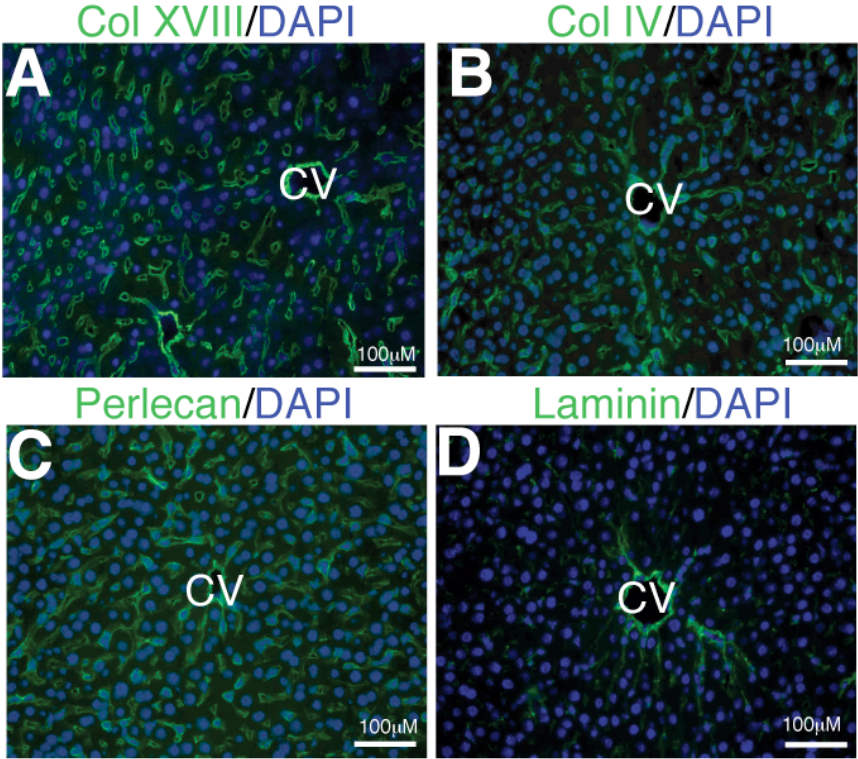

## Supplemental Figure 2

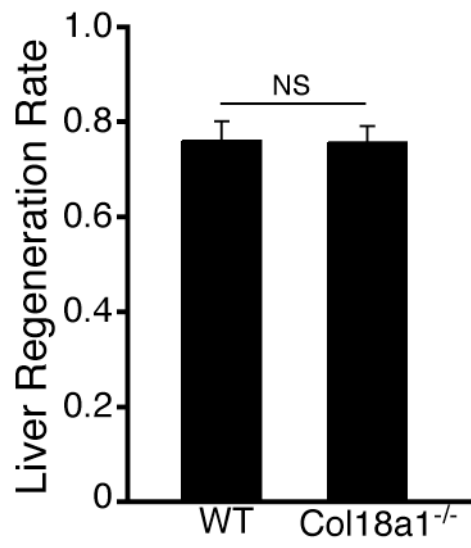

### Supplemental Figure 3

**A** WT +Phenobarbital

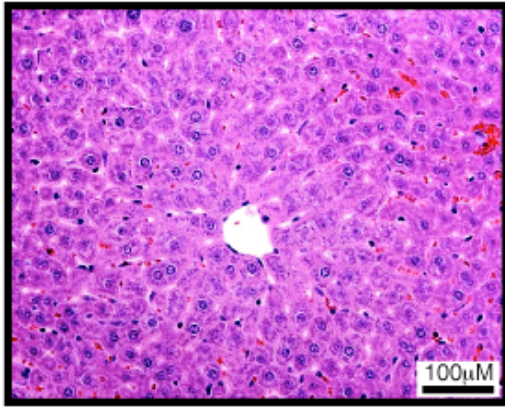

**B** Col18a1<sup>-/-</sup> +Phenobarbital

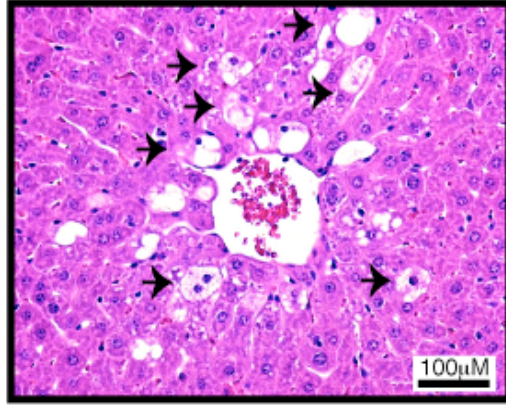

## Supplemental Figure 4

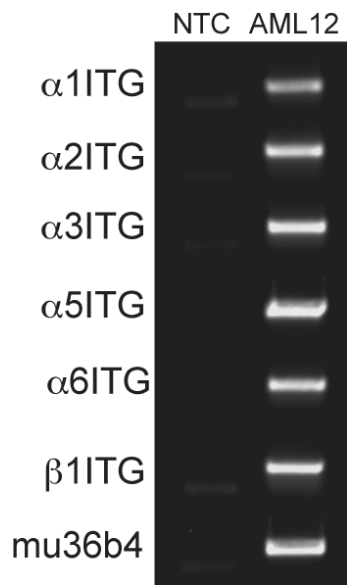

## Supplemental Figure 5

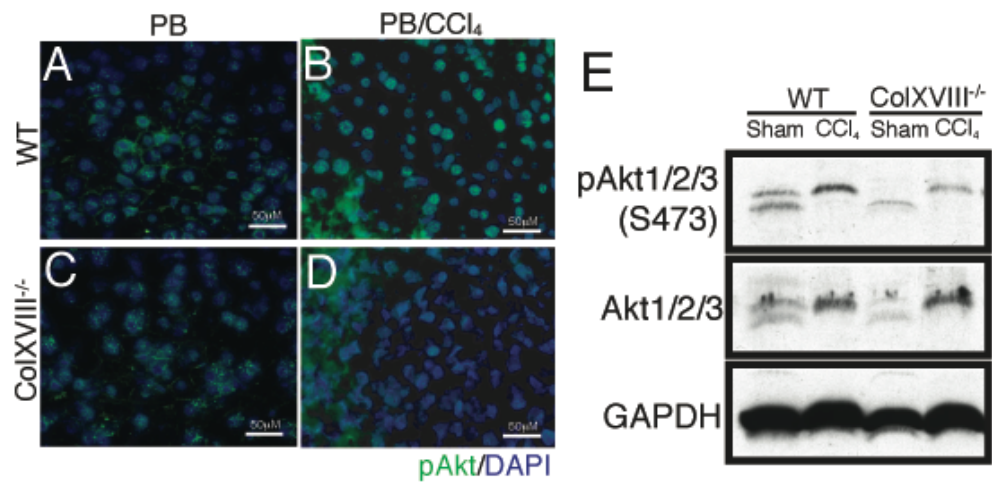

Supplement: supp_011577_DMM011577.pdf [file supp_011577_DMM011577.pdf]
